# Supplementary material for: Histo-Blood Group Antigen-Producing Bacterial Cocktail Reduces Rotavirus A, B, and C Infection and Disease in Gnotobiotic Piglets
Source: MDPI journal article supplement (doi:10.3390/v16050660), 2024-04-24
Supplement: s1 [file s1]

## Article

# Histo-blood group antigen-producing bacteria cocktail reduces rotavirus A, B and C infection and disease in gnotobiotic pig-lets

Sergei A. Raev<sup>1</sup>, Maryssa K. Kick<sup>1</sup>, Maria Chellis<sup>1</sup>, Joshua O. Amimo<sup>2</sup>, Linda J. Saif<sup>1</sup>, and Anastasia N. Vlasova<sup>1\*</sup>

<sup>1</sup> Center for Food Animal Health, Department of Animal Sciences, College of Food, Agricultural and Environmental Sciences, The Ohio State University, Wooster, OH, USA

<sup>2</sup> GIVAX Inc., Philadelphia, PA, USA

\* Correspondence: vlasova.1@osu.edu;

## SUPPLEMENTARY MATERIALS

**Table S1.** Primers used in this study.

| Target Organism            | Primer | Sequence (5'-3')           | Reference |
|----------------------------|--------|----------------------------|-----------|
| <i>S. bovis</i>            | F      | ATGTTAGATGCTTGAAAGGAGCAA   | (43)      |
|                            | R      | CGCCTTGGTGAGCCGTTA         |           |
| <i>B. thetaiotaomicron</i> | F      | CGTTCCATTAGGCAGTTGGT       | (44)      |
|                            | R      | CGTAGGAGTTTGGACCGTGT       |           |
| <i>C. clostridiiforme</i>  | F      | AATCTTGATTGACTGAGTGGCGGAC  | (45)      |
|                            | R      | CCATCTCACACTACCGGAGTTTTTC  |           |
| <i>B. adolescentis</i>     | F      | CTCCGCCGCTGATCCGGAAGTCG    | (46)      |
|                            | R      | AACCAACTCGGCGATGTGGACGACA  |           |
| <i>B. longum</i>           | F      | CGGCGTYGTGACCGTTGAAGAC     |           |
|                            | R      | TGYTTCGCCRTCGACGTCCTCA     |           |
| <i>L. brevis</i>           | F      | CTTCTGGATGATCCCGCGGCG      | (47)      |
|                            | R      | ACCGCCTGCGCTCGCTTTAC       |           |
| <i>E. coli</i> G58         | F      | GCGAGGTAACCTCGAACATG       | (48)      |
|                            | R      | CGCCGTATCGATAATTCACG       |           |
| Rotavirus B                | F      | GGTTTAAATAGCCCAACCGGTGC    | (52)      |
|                            | R      | TGCAATTTRATGCATGCGTT       |           |
|                            | Probe  | FAM/AGCATGGATCTGATYGAAACRG |           |

---

|             |              |                        |      |
|-------------|--------------|------------------------|------|
| Rotavirus C | <b>F</b>     | ATGTAGCATGATTACGAATGGG | (51) |
|             | <b>R</b>     | ACATTTCATCCTCCTGGGGATC |      |
|             | <b>Probe</b> | FAM/TTGCGTAGGGGCAAATGC |      |

---

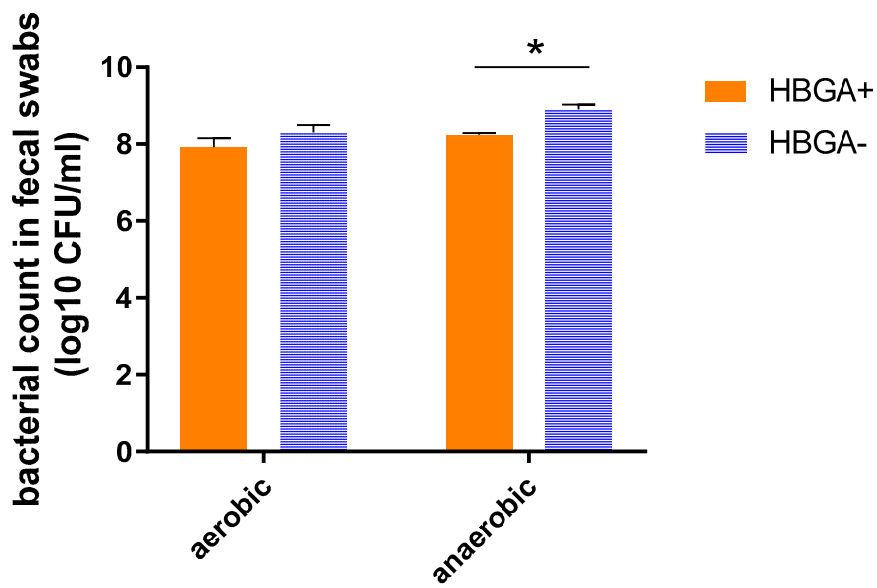

**Figure S1.** Fecal probiotic bacterial shedding from probiotic colonized piglets. An asterisk indicates significant difference ( $p < 0.05$ ) in fecal probiotics counts among treatment groups.

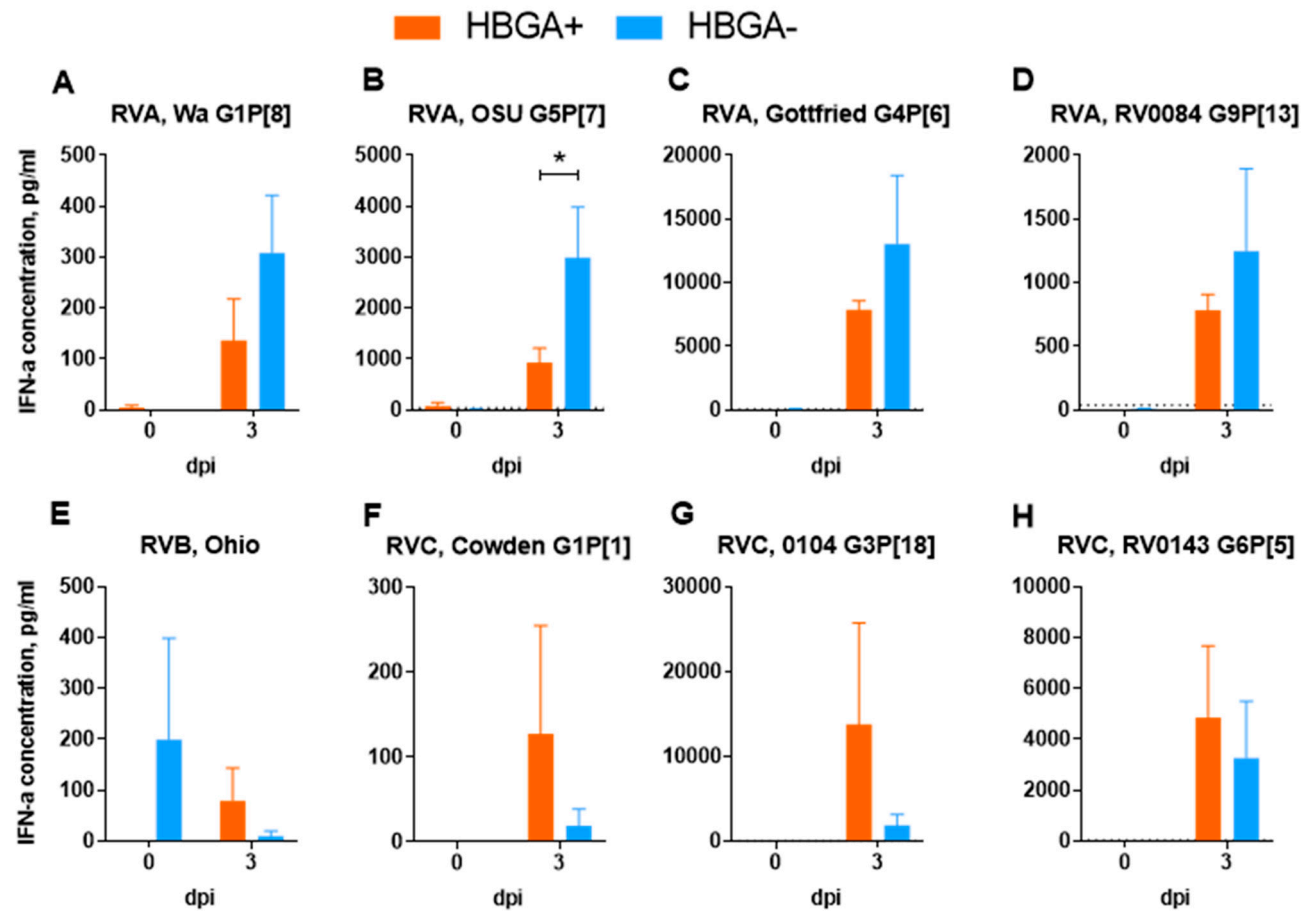

**Figure S2.** IFN- $\alpha$  concentrations in piglet blood samples collected on dpi 0 and dpi 3 following RVA (A-D); RVB (E) and RVC (F-H) infection. Significant differences (\*  $p < 0.05$ ) are indicated as calculated by two-way ANOVA followed by Sidak's multiple comparisons test.

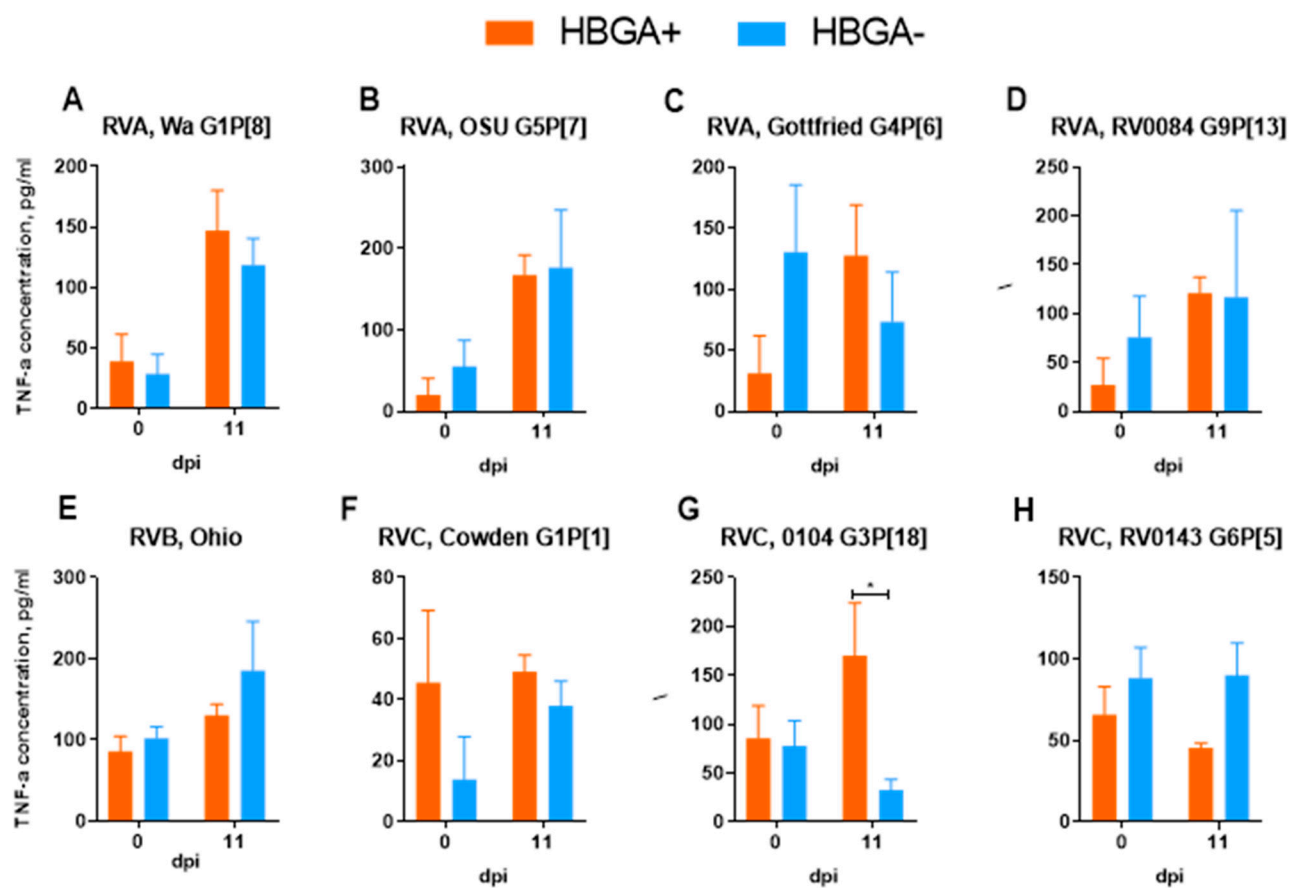

**Figure S3.** TNF- $\alpha$  concentrations in piglet blood samples collected on dpi0 and 11 following RVA (A-D); RVB (E) and RVC (F-H) infection. Significant differences ( $* p < 0.05$ ) are indicated as calculated by two-way ANOVA followed by Duncan's multiple comparisons test.

Table S2. Diarrhea and virus shedding in gnotobiotic piglets after oral inoculation with virulent RVs.

| RV<br>specie<br>s | HBGA<br>phenotype                             | Diarrhea           |                   |                                                   |                   |                                                     |                   |                                                |                   |                   |                   | Viral shedding                       |                   |                                        |                   |                            |                   |                   |                   |
|-------------------|-----------------------------------------------|--------------------|-------------------|---------------------------------------------------|-------------------|-----------------------------------------------------|-------------------|------------------------------------------------|-------------------|-------------------|-------------------|--------------------------------------|-------------------|----------------------------------------|-------------------|----------------------------|-------------------|-------------------|-------------------|
|                   |                                               | N                  |                   | Mean<br>days to<br>diarrhea<br>onset <sup>1</sup> |                   | Mean<br>diarrhea<br>duration<br>(days) <sup>2</sup> |                   | Mean<br>cumulative<br>fecal score <sup>3</sup> |                   | AUC <sup>4</sup>  |                   | Mean<br>days to<br>shedding<br>onset |                   | Mean<br>shedding<br>duration<br>(days) |                   | Avg peak titer<br>(FFU/ml) |                   | AUC <sup>4</sup>  |                   |
|                   |                                               | Bacterial cocktail |                   |                                                   |                   |                                                     |                   |                                                |                   |                   |                   |                                      |                   |                                        |                   |                            |                   |                   |                   |
|                   |                                               | HBGA <sup>+</sup>  | HBGA <sup>-</sup> | HBGA <sup>+</sup>                                 | HBGA <sup>-</sup> | HBGA <sup>+</sup>                                   | HBGA <sup>-</sup> | HBGA <sup>+</sup>                              | HBGA <sup>-</sup> | HBGA <sup>+</sup> | HBGA <sup>-</sup> | HBGA <sup>+</sup>                    | HBGA <sup>-</sup> | HBGA <sup>+</sup>                      | HBGA <sup>-</sup> | HBGA <sup>+</sup>          | HBGA <sup>-</sup> | HBGA <sup>+</sup> | HBGA <sup>-</sup> |
| RVA               | H <sup>+</sup> A <sup>-</sup>                 | 3                  | 2                 | 1.7                                               | 1.5               | 3.0                                                 | 6.5               | 12                                             | 18.5              | 11                | 17.7              | 2                                    | 1.5               | 6                                      | 7.5               | 7.50E+04                   | 1.49E+07          | 2.41E+06          | 2.58E+07          |
|                   | H <sup>+</sup> /H <sup>-</sup> A <sup>+</sup> | 12                 | 13                | 2.3                                               | 2                 | 3.7                                                 | 4.8               | 12.3                                           | 14.5              | 11.8              | 14                | 1.8                                  | 1.7               | 6.3                                    | 7.2               | 4.69E+06                   | 3.30E+06          | 9.47E+06          | 6.95E+06          |
| RVB               | H <sup>+</sup> /H <sup>-</sup> A <sup>+</sup> | 4                  | 3                 | 2                                                 | 1                 | 5.2                                                 | 7.7               | 13.5                                           | 19.7              | 13.5              | 19.7              | 1                                    | 1                 | 7                                      | 7                 | 1.05E+03                   | 1.88E+03          | 2.07E+03          | 2.44E+03          |
| RVC               | H <sup>+</sup> A <sup>-</sup>                 | 5                  | 4                 | 3.8                                               | 2.9               | 4.2                                                 | 5                 | 14.4                                           | 15.5              | 13.9              | 14.7              | 2.4                                  | 1.7               | 8.6                                    | 10                | 2.00E+06                   | 2.00E+05          | 3.13E+06          | 3.13E+06          |
|                   | H <sup>+</sup> /H <sup>-</sup> A <sup>+</sup> | 6                  | 11                | 2.7                                               | 2.5               | 4.2                                                 | 5.1               | 13.5                                           | 15.5              | 13                | 14.9              | 2                                    | 1.4               | 9.2                                    | 10                | 1.54E+06                   | 7.39E+05          | 1.71E+06          | 1.71E+06          |

<sup>1</sup>Diarrhea onset is defined as the number of days between the virus inoculation and the first manifestation of diarrhea with a score not less than 2. <sup>2</sup>Duration of diarrhea is defined as the number of days that the diarrhea score was 2. Fecal diarrhea was scored as follows: 0, normal; 1, pasty; 2, semiliquid; 3, liquid. <sup>3</sup>Mean cumulative fecal score [(sum of fecal consistency score for 11 days postinoculation)/N], where N is the number of pigs receiving the inoculation. Means in the same row were analyzed by unpaired t-test. <sup>4</sup>Area under the curve (AUC) was calculated using the area under the curve analysis function in the Prism software. A Kruskal-Wallis rank sum test was then performed to compare the total AUC between the groups. Significant differences (**bold**) are indicated as calculated by unpaired t-test.

**Table S3.** Data on the ability of individual HBGA+ and HBGA- bacterial strains to bind virulent RVs (16).

| HBGA expression status | Strain                     | RV-bacteria binding |         |        |        |        |
|------------------------|----------------------------|---------------------|---------|--------|--------|--------|
|                        |                            | RVA                 |         |        |        | RVC    |
|                        |                            | G5P[7]              | G9P[13] | G4P[6] | G1P[8] | G1P[1] |
| HBGA+                  | <i>S. bovis</i>            | no                  | no      | no     | no     | no     |
|                        | <i>B. thetaiotaomicron</i> | no                  | no      | no     | yes*   | no     |
|                        | <i>C. clostridiiforme</i>  | yes***              | yes***  | no     | no     | no     |
|                        | <i>B. adolescentis</i>     | no                  | no      | yes*   | yes*   | yes*   |
|                        | <i>E. coli G58</i>         | no                  | yes**   | yes*** | yes**  | no     |
| HBGA-                  | <i>B. longum</i>           | no                  | no      | no     | no     | no     |
|                        | <i>L. brevis</i>           | no                  | no      | no     | no     | no     |

The table represents the difference in the amount of bacteria-bound RV. \* P<0.05, \*\* P≤0.01, \*\*\* P≤0.001.
